# Supplementary material for: Ratiometric detection of pH fluctuation in mitochondria with a new fluorescein/cyanine hybrid sensor
Source: Royal Society of Chemistry journal article supplement (doi:10.1039/c4sc04021j), 2015-01-01
Supplement: c4sc04021j1.pdf [file c4sc04021j1.pdf]

Supporting Information  
for  
**Ratiometric detection of pH fluctuation in mitochondria with a new  
fluorescein/cyanine hybrid sensor**

Yuncong Chen, Chengcheng Zhu, Jiajie Cen, Yang Bai, Weijiang He,\* and Zijian Guo\*

State Key Laboratory of Coordination Chemistry, Coordination Chemistry Institute, School of Chemistry and Chemical Engineering, Nanjing University, Hankou Road No.22, Nanjing 210093, PR China

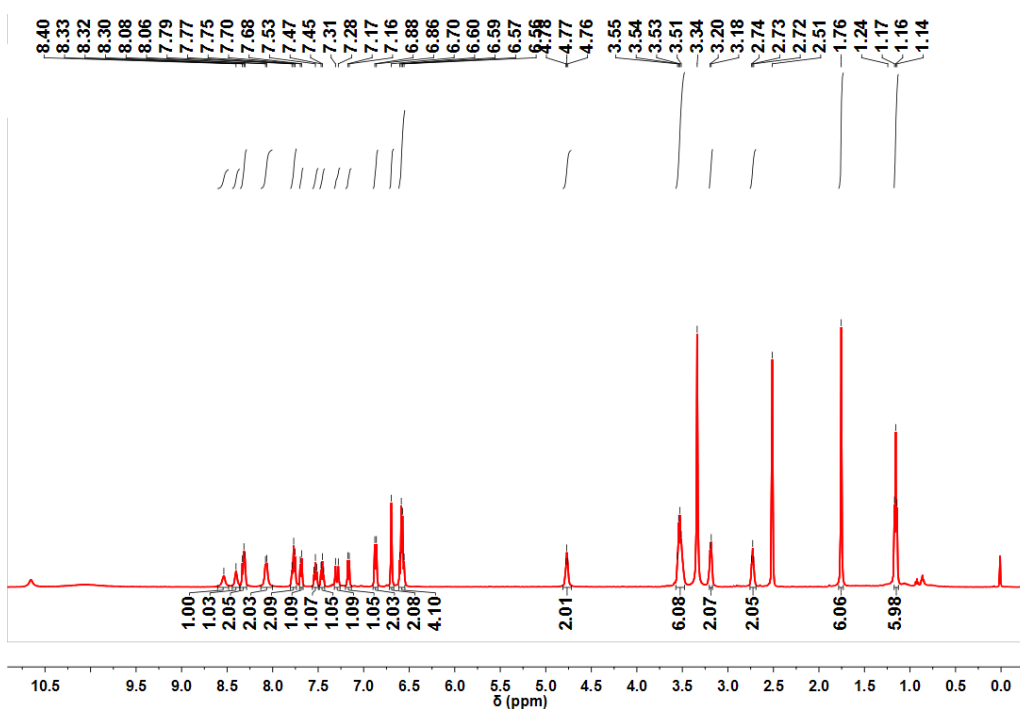

Fig. S1  $^1\text{H}$  NMR spectrum of Mito-pH in  $\text{DMSO-}d_6$ .

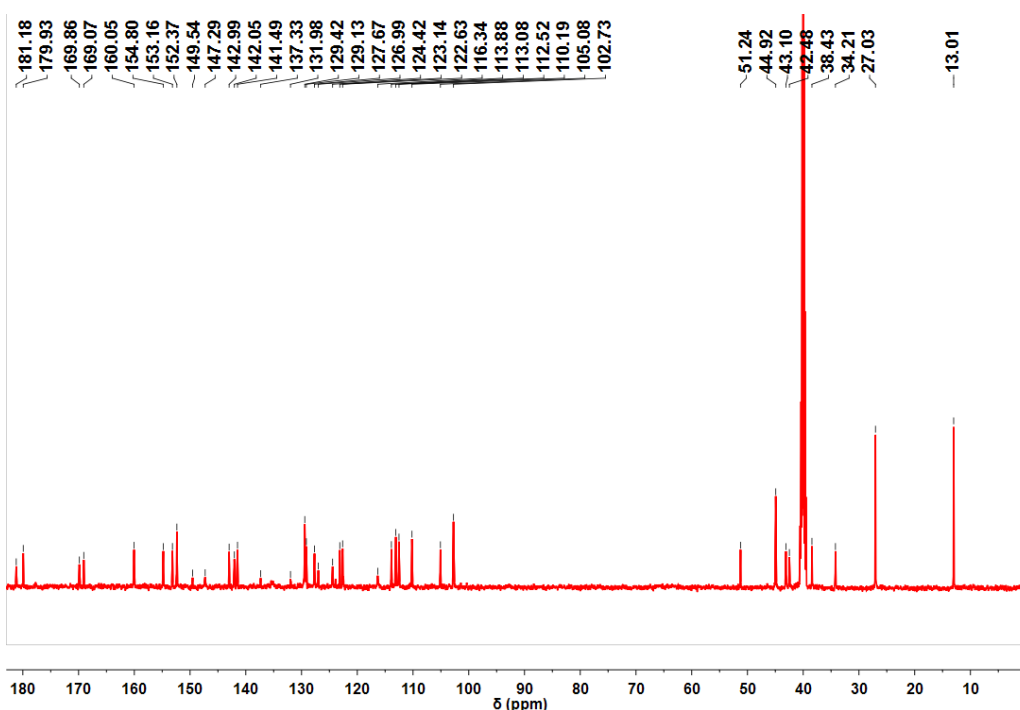

Fig. S2  $^{13}\text{C}$  NMR spectrum of Mito-pH in  $\text{DMSO-}d_6$ .

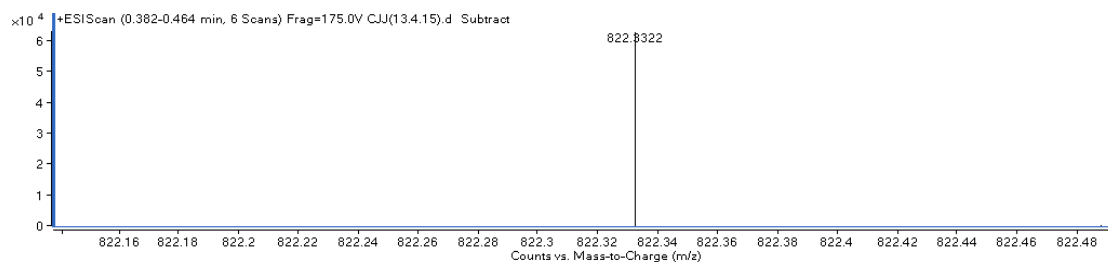

Fig. S3 ESI-HRMS of Mito-pH.

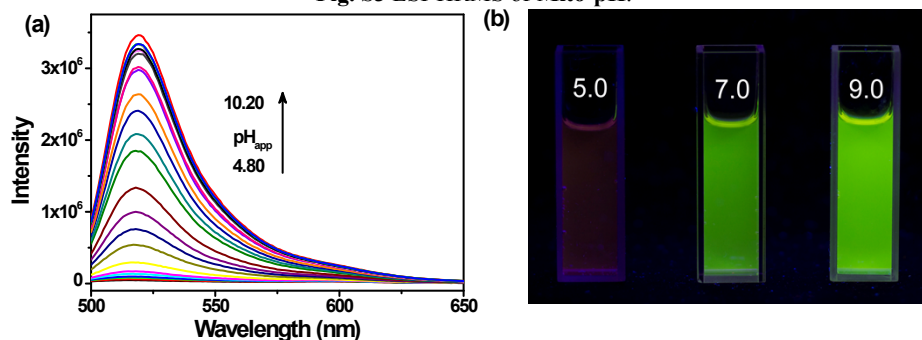

Fig. S4 (a) Emission spectra of 10  $\mu\text{M}$  Mito-pH in PBS buffer of different pH values containing 10% DMSO(v/v).  $\lambda_{\text{ex}}$ , 490 nm. (b) Photograph of the fluorescence of Mito-pH in this media of different pH values upon irradiation with a UV-lamp of 365 nm.

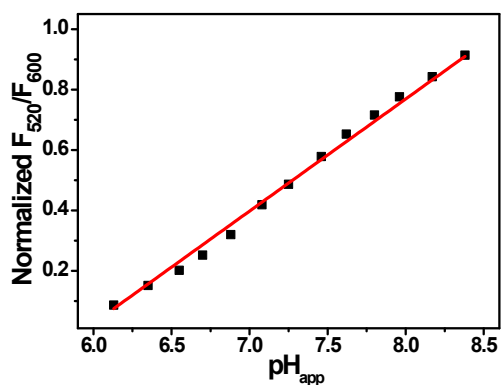

Fig. S5 Emission ratio  $F_{520}/F_{600}$  (o) of Mito-pH (10  $\mu\text{M}$ ) in PBS buffer of different  $\text{pH}_{\text{app}}$  values containing 10% DMSO(v/v) and its linear fitting (red line).  $F_{520}/F_{600}$  is the normalized ratio of emission at 520 nm ( $\lambda_{\text{ex}}$ , 490 nm) to that at 600 nm ( $\lambda_{\text{ex}}$ , 560 nm).

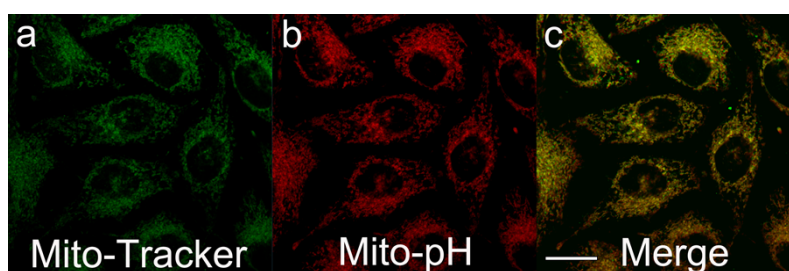

Fig. S6 Pseudo-colour confocal fluorescence images of MCF-7 cells incubated firstly with DMEM containing Mito-pH (10  $\mu\text{M}$ , 60 min) and Mito-Tracker Deep Red 633 (1  $\mu\text{M}$ , 30 min) at 25°C, followed by incubation with high  $\text{K}^+$  buffers (30 mM NaCl, 120 mM KCl, 1 mM  $\text{CaCl}_2$ , 0.5 mM  $\text{MgSO}_4$ , 1 mM  $\text{NaH}_2\text{PO}_4$ , 5 mM glucose, 20 mM HEPES, and 20 mM NaOAc) of pH 8.50 in the presence of 10.0  $\mu\text{M}$  nigericin. (a) Fluorescence image obtained with the band path 660-750 nm upon excitation at 633 nm (Mito-Tracker channel); (b) fluorescence image obtained with the band path 560-640 nm upon excitation at 543 nm (Mito-pH channel); (c) overlay of (a) and (b). Scale bar: 20  $\mu\text{m}$ .
